# Supplementary figures and images for: Restoring function in exhausted CD8 T cells during chronic viral infection
Source: Springer Nature journal article supplement (doi:10.1038/nature04444), 2005-12-28

**Ahmed Supplemental Figure 1**  
**ref# 2005-07-08957B**

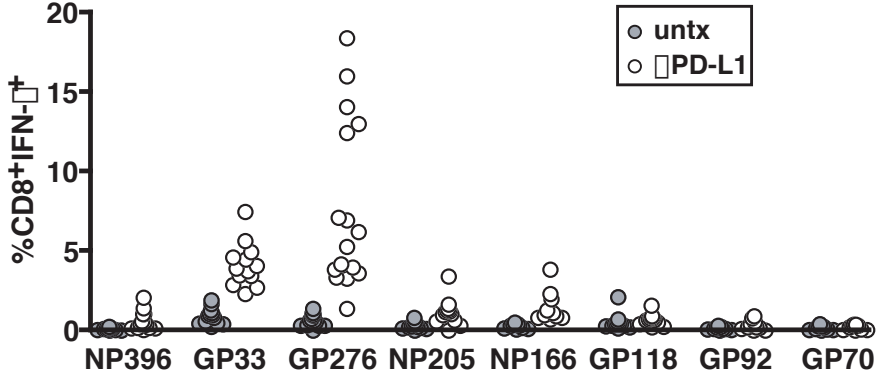

Supplement: 41586_2006_BFnature04444_MOESM1_ESM.pdf [file 41586_2006_BFnature04444_MOESM1_ESM.pdf]

# Ahmed Supplemental Figure 2 - ref# 2005-07-08957B

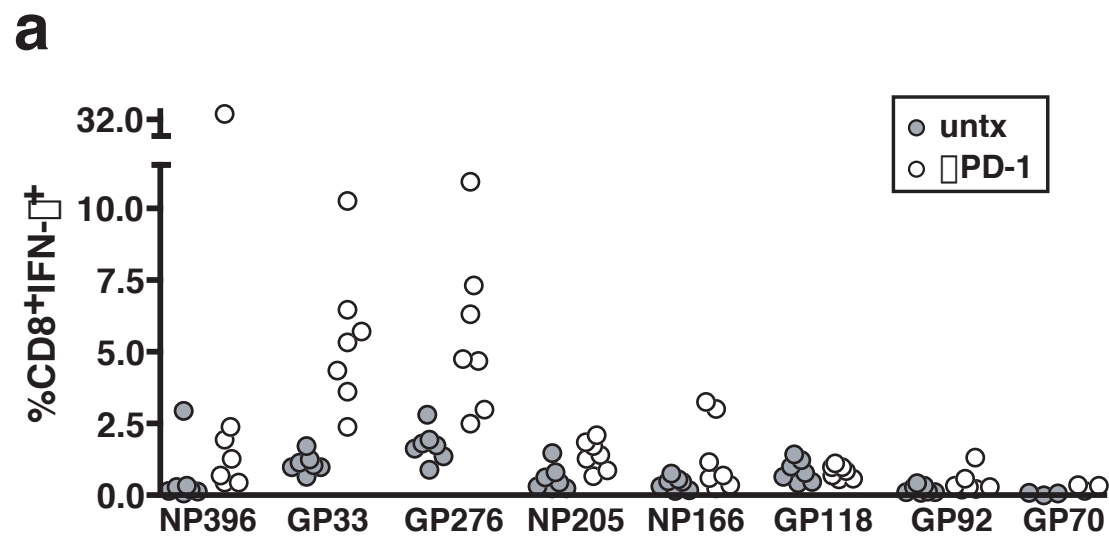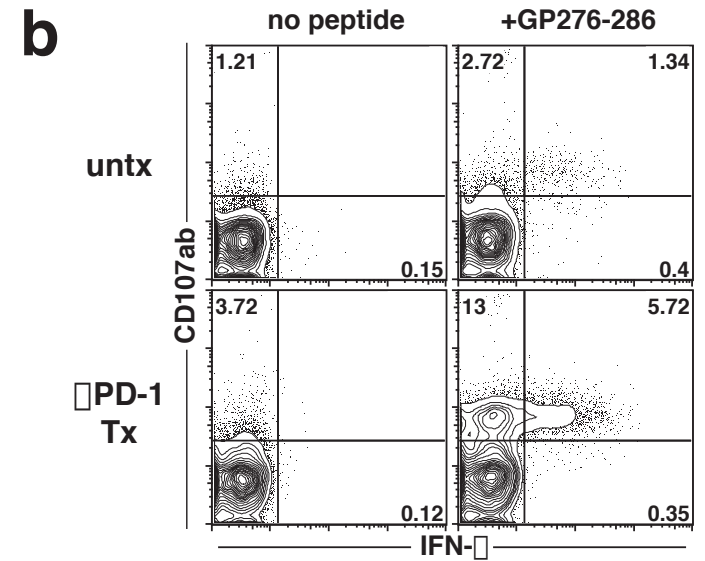

Supplement: 41586_2006_BFnature04444_MOESM2_ESM.pdf [file 41586_2006_BFnature04444_MOESM2_ESM.pdf]

Ahmed Supplemental Figure 3 - ref# 2005-07-08957B

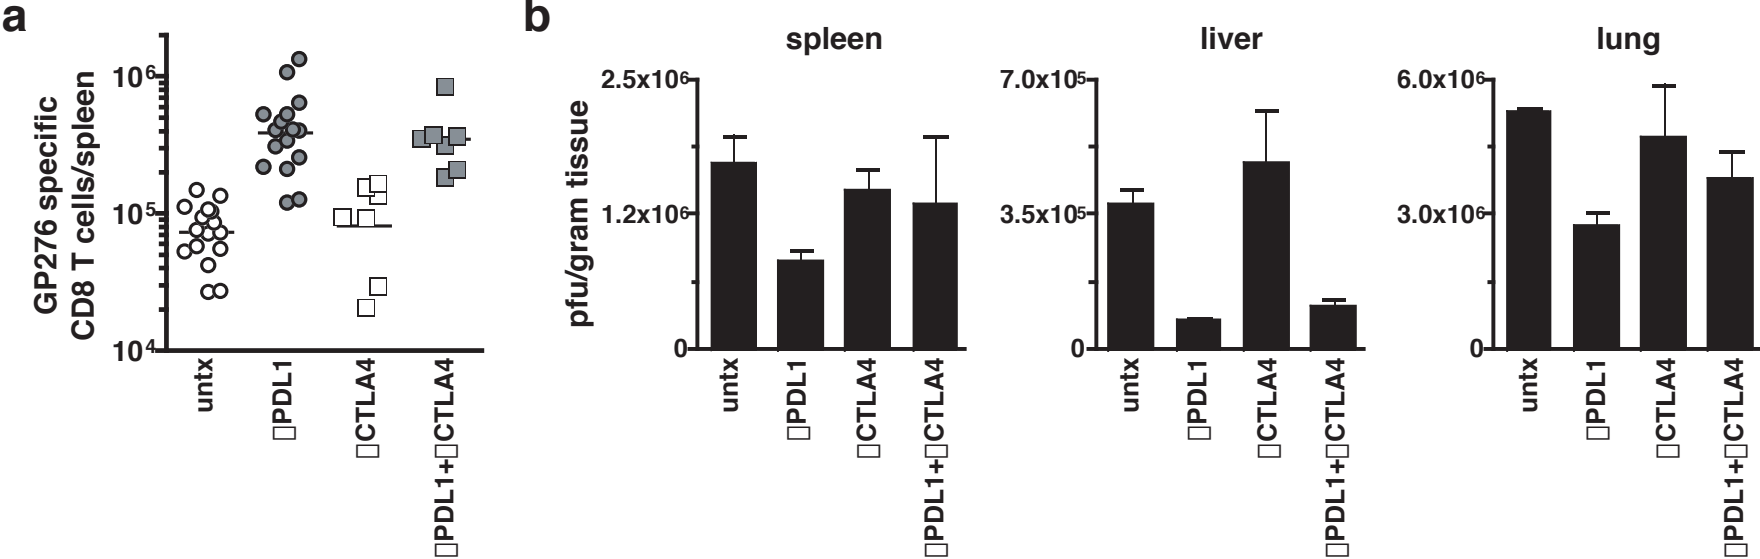

Supplement: 41586_2006_BFnature04444_MOESM3_ESM.pdf [file 41586_2006_BFnature04444_MOESM3_ESM.pdf]

# Ahmed supplemental Figure 4

ref# 2005-07-08957B

**a**

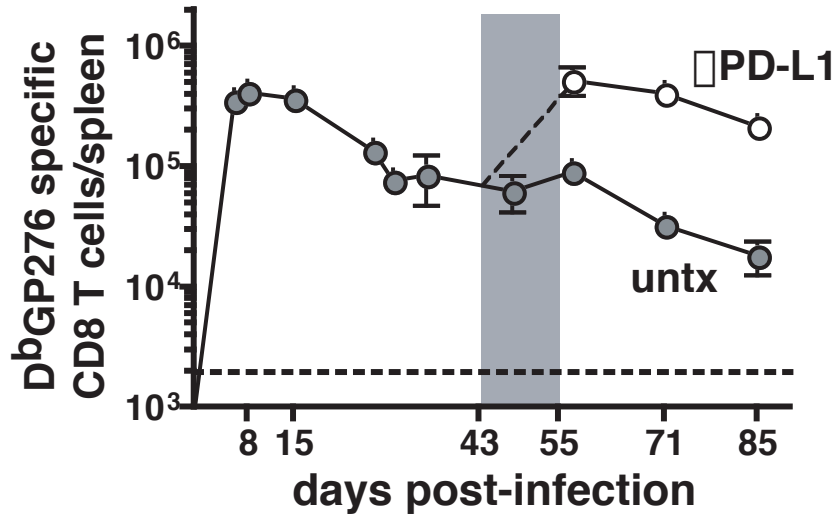

**b**

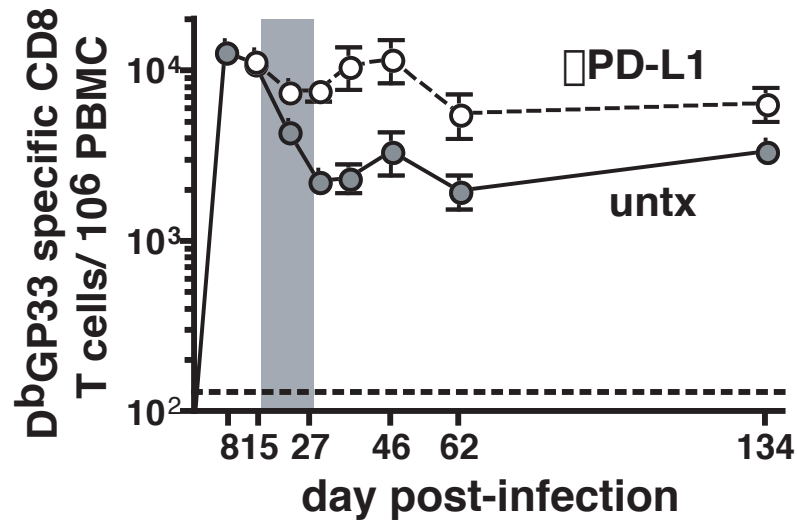

**c**

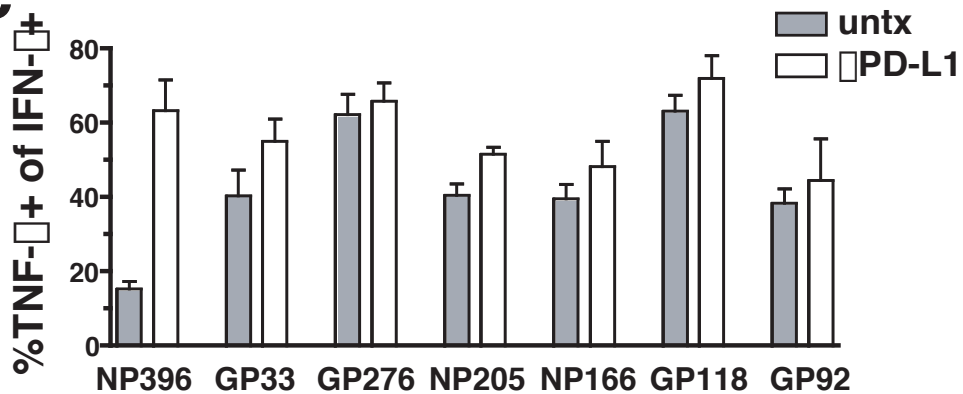

Supplement: 41586_2006_BFnature04444_MOESM4_ESM.pdf [file 41586_2006_BFnature04444_MOESM4_ESM.pdf]
